# Supplementary material for: Interfacial engineering design induces enriched-defects expediting catalytic conversion kinetics of polysulfides
Source: Royal Society of Chemistry journal article supplement (doi:10.1039/d3ta07886h), 2024-01-01
Supplement: d3ta07886h1.pdf [file d3ta07886h1.pdf]

# 1 Interfacial engineering design induces enriched-defects expediting the catalytic 2 conversion kinetics of polysulfides

3 Guixin Zhang, Xiaorong Chen, Xinmeng Yu, Qingyu Li, Hongqiang Wang, Sijiang Hu, Juantao Jiang,  
4 Youguo Huang\*, Zhaoling Ma\*

5 Guangxi Key Laboratory of Low Carbon Energy Materials, Guangxi New Energy Ship Battery  
6 Engineering Technology Research Center, Guangxi scientific and technological achievements  
7 transformation pilot research base of electrochemical energy materials and devices, School of  
8 Chemistry and Pharmaceutical Sciences, Guangxi Normal University, Guilin 541004, China

9 E-mail: zhaolingma@163.com (Zhaoling Ma), huangyig72@163.com (Youguo Huang)

## 10 1. Experimental section

### 11 1.1. Materials preparation

#### 12 1.1.1 Chemicals

13 Polyvinylpyrrolidone [PVP K30] (AR, Sinopharm Chemical Reagent Co., Ltd.), hydroxylated  
14 multi-walled carbon nanotubes [CNT] (Chengdu Organic Chemicals Co., Ltd.), Cobalt chloride  
15 hexahydrate [ $\text{CoCl}_2 \cdot 6\text{H}_2\text{O}$ ] (AR, Xilong Chemical Co., Ltd.), Sodium molybdate dihydrate  
16 [ $\text{Na}_2\text{MoO}_4 \cdot 2\text{H}_2\text{O}$ ] (AR, Xilong Chemical Co., Ltd.), Sublimed sulfur [S] (AR, Sinopharm Chemical  
17 Reagent Co., Ltd.), Lithium sulfide [ $\text{Li}_2\text{S}$ ] (AR, Aladdin Co., Ltd.), Urea [ $\text{CO}(\text{NH}_2)_2$ ] (AR, Xilong  
18 Chemical Co., Ltd.), Hydrochloric acid [HCl] (AR, Xilong Chemical Co., Ltd.).

#### 19 1.1.2 Synthesis of Co-Mo/CNT precursors

20 Co-Mo/CNT precursors are prepared by a simple hydrothermal method. Firstly, 25 mg of  
21 surfactant polyvinylpyrrolidone (PVP, K30) is dissolved in 60 mL deionized water, and stirred until  
22 completely dissolved. Then 50 mg hydroxylated carbon nanotubes (CNT) are added, stirred and  
23 ultrasonic dispersed until even. The aqueous solution containing 10 mL 0.43 mmol  $\text{CoCl}_2 \cdot 6\text{H}_2\text{O}$  and  
24 the aqueous solution containing 10 mL 0.43 mmol  $\text{Na}_2\text{MoO}_4 \cdot 2\text{H}_2\text{O}$  are slowly dripped into the water  
25 and stirred for 30 min. Hydroxylated CNT can adsorb metal cations by electrostatic action to promote  
26 its in situ nucleation growth. The mixed liquid is put into the inner liner of a Teflon lined reactor and  
27 hydrothermal reaction at 150 °C in a blast drying oven for 6 h. After cooling, the mixture is vacuum-  
28 filtered, and the black solid products are washed with deionized water for 3 times. Finally, the products  
29 are collected overnight in a vacuum freeze-dryer. For comparison, the precursor with different Co-Mo  
30 precursors loads is prepared by regulating the concentrations of  $\text{CoCl}_2 \cdot 6\text{H}_2\text{O}$  and  $\text{Na}_2\text{MoO}_4 \cdot 2\text{H}_2\text{O}$ . The  
31 molar ratio of cobalt source and molybdenum source is 1:1, and other conditions remained unchanged.

#### 32 1.1.3 Synthesis of $\text{CoS}_2$ - $\text{MoS}_2$ /CNT composites

33  $\text{CoS}_2$ - $\text{MoS}_2$ /CNT composites are processed by a simple vapor phase annealing vulcanization  
34 method. The Co-Mo/CNT precursor prepared in the previous step is weighed at 100 mg and placed in

---

1 the middle of the quartz tube of the tubular furnace. Another 1000 mg of sublimated sulfur (S) is placed  
2 in another sintering boat and placed on the upstream of the quartz tube of the tubular furnace. In the  
3 atmosphere of argon, the room temperature is heated from 5 °C/min to 450 °C for 4 h. Collect solid  
4 samples after cooling, seal, and dry storage. For comparison, the CoS<sub>2</sub>-MoS<sub>2</sub>/CNT composites with  
5 different metal sulfide loads (n= 10%, 20%, 30% (prepared from 0.43 mmol cobalt and molybdenum  
6 sources) and 40%). CoS<sub>2</sub>-MoS<sub>2</sub>/CNT composites are prepared by vulcanizing the precursor with  
7 different Co-Mo compound loads in the previous process. Other conditions remained unchanged.

#### 8 1.1.4 Synthesis of CoS<sub>2</sub>/CNT composites

9 CoS<sub>2</sub>/CNT composites are also prepared by simple hydrothermal and annealed vulcanization  
10 methods in order to control the synthesis of the same conditions. First, 25 mg of surfactant  
11 polyethylpyrrolidone (PVP, K30) is dissolved in 60 mL deionized water, and magnetic stirring is  
12 performed for 10 min until PVP is completely dissolved. Then 50 mg hydroxylated multi-walled  
13 carbon nanotubes (MWCNT) are added, stirred for 10 min and placed in an ultrasonic cleaner for  
14 ultrasonic dispersion for 1 h. Then 0.34 mmol CoCl<sub>2</sub>·6H<sub>2</sub>O and 1.38 mmol urea (CO(NH<sub>2</sub>)<sub>2</sub>) are added  
15 to stir for 30 min, followed by hydrothermal reaction in 150 °C for 6 h. After cooling, vacuum filtration  
16 is carried out, and the black solid products are washed with deionized water and ethanol for 3 times.  
17 Finally, they are put in the vacuum freeze dryer overnight. Collected product Co(OH)<sub>2</sub>/CNT. The  
18 Co(OH)<sub>2</sub>/CNT precursor is cured by annealing at 450 °C in a tubular furnace for 4 h to obtain  
19 CoS<sub>2</sub>/CNT, and the metal sulfide load is controlled to 30%.

#### 20 1.1.5 Synthesis of MoS<sub>2</sub>/CNT composites

21 In order to control the synthesis of the same conditions, MoS<sub>2</sub>/CNT composites are also prepared  
22 by simple hydrothermal method and annealing vulcanization method. First, 25 mg of surfactant  
23 polyethylpyrrolidone (PVP, K30) is dissolved in 60 mL deionized water, and magnetic stirring is  
24 performed for 10 min until PVP is completely dissolved. Then 50 mg hydroxylated multi-walled  
25 carbon nanotubes (MWCNT) are added, stirred for 10 min and placed in an ultrasonic cleaner for  
26 ultrasonic dispersion for 1 h. Then 0.22 mmol Na<sub>2</sub>MoO<sub>4</sub>·2H<sub>2</sub>O and 0.308 mmol glucose (C<sub>6</sub>H<sub>6</sub>O<sub>6</sub>,  
27 reducing agent) are added into the mixture for 15 min, and 0.6 mL 10 M concentrated hydrochloric  
28 acid (HCl) is added into the mixture drop by drop. The mixture is then subjected to hydrothermal  
29 reaction in 180 °C for 12 h in a blast oven. After cooling, vacuum filtration is performed, and the black  
30 solid products are washed with deionized water and ethanol for 3 times. Then, the black solid products  
31 MoO<sub>2</sub>/CNT are collected by freeze-drying. The MoO<sub>2</sub>/CNT precursor is cured by annealing at 450 °C  
32 in a tube furnace for 4 h to obtain MoS<sub>2</sub>/CNT, and the metal sulfide load is controlled to 30%.

#### 33 1.1.6 Preparation of Li<sub>2</sub>S<sub>6</sub> solution and Visual adsorption experiment

34 To prepare 0.2 M Li<sub>2</sub>S<sub>6</sub> solution, the sublimed sulfur and lithium sulfide with a molar ratio of 5:1

---

1 were added into the mixed solvent of 1, 2-dimethoxyethane/1, 3-dioxolane (DME/DOL, v:v=1:1) and  
2 stirred at 60 °C for 12 h until formed a homogeneous solution. Then, 10 mg powder samples (CNT,  
3 CoS<sub>2</sub>/CNT, MoS<sub>2</sub>/CNT, CoS<sub>2</sub>-MoS<sub>2</sub>/CNT) were immersed into the vials with 4 mL of diluted 2 mM  
4 Li<sub>2</sub>S<sub>6</sub> solution, respectively. These vials were gentle shaken by hand for several times to disperse the  
5 samples, and digital image was recorded after 12 h of absorption. All of the above operations were  
6 carried out in an argon-filled glove box. To more accurately estimate the absorption ability of samples  
7 for Lithium polysulfide, the UV-Vis spectra experiments were measured for the of the supernatant  
8 diluted 30 times after soaking the samples.

### 9 1.1.7 Assembly and tests of Li<sub>2</sub>S<sub>6</sub> symmetric cells

10 To fabricate the electrodes, 80 wt% the powder samples (CNT, CoS<sub>2</sub>/CNT, MoS<sub>2</sub>/CNT, CoS<sub>2</sub>-  
11 MoS<sub>2</sub>/CNT), 10 wt% Super P and 10 wt% PVDF were added into a moderate NMP solvent to form  
12 the uniform slurries, following by coating onto Al foils and vacuum drying oven overnight at 60 °C  
13 for 12 h. The coating Al foils were punched into a 14 mm diameter round sheet as identical the work  
14 electrodes and counter electrodes. The electrodes were assembled into the CR2025 coin cells with a  
15 Celgard 2500 separators and 50 μL of 0.2 M Li<sub>2</sub>S<sub>6</sub> electrolyte containing 1 M LiTFSI (25 μL for each  
16 side of the separator). As a contrast, the cells of electrolyte without Li<sub>2</sub>S<sub>6</sub> were assembled based on the  
17 same method to eliminate the contribution of electrical double-layer capacitor. Cyclic voltammetry  
18 (CV) measurements of the symmetric cells were operated from -0.8 V to 0.8 V at a scan rate of 5 mV/s.  
19 Electrochemical impedance spectroscopy (EIS) was carried out in a sinusoidal voltage. The amplitude  
20 was identified to 5 mV and the frequency range was between 0.01 Hz and 100 kHz.

### 21 1.1.8 Li<sub>2</sub>S nucleation tests

22 Li<sub>2</sub>S<sub>8</sub> solution (0.2 M) was prepared by mixing S<sub>8</sub> and Li<sub>2</sub>S (molar ratio of 7:1) in tetraglyme  
23 solvent containing 1M LiTFSI under vigorous stirring at 50 °C until formed a well-distributed solution.  
24 Commercial carbon paper (CP) was used as the current collector to load samples (CNT, CoS<sub>2</sub>/CNT,  
25 CoS<sub>2</sub>/CNT and CoS<sub>2</sub>-MoS<sub>2</sub>/CNT) with a loading about 1.5 mg. The obtained electrode, Li foil and  
26 Celgard 2500 membrane were selected as the cathode, anode and separator. 25 μL of Li<sub>2</sub>S<sub>8</sub> solution  
27 (0.2 M) was dropped onto the cathode side, and then 25 μL of LiTFSI (0.2 M) without Li<sub>2</sub>S<sub>8</sub> solution  
28 was dispersed to the Li anode side to obtain the CR2032 coin cells. The assembled cells firstly were  
29 galvanostatically discharged to 2.06 V at 0.112 mA and then discharged potentiostatically at 2.05 V  
30 until the current dropped below 10<sup>-5</sup> A to allow Li<sub>2</sub>S nucleation. Faraday's law is used for the  
31 calculation of the Li<sub>2</sub>S nucleation capacity of the integral area of plotted curves. The nucleation  
32 capacity of Li<sub>2</sub>S is calculated by the integral area of the plotted curves based on Faraday's law. The  
33 earlier peak position (t<sub>m</sub>) represents the quicker Li<sub>2</sub>S nucleation and growth rate constant (Ak<sup>2</sup>), which  
34 is based on the following **Eq. 1**.

---

$$Ak^2 = 2/\pi t_m^3 \quad \text{Eq. (1)}^1$$

### 1.1.9 Preparation of the functional separators

The powder samples (CNT, CoS<sub>2</sub>/CNT, CoS<sub>2</sub>/CNT and CoS<sub>2</sub>-MoS<sub>2</sub>/CNT), Super P and PVDF with a mass ratio of 8:1:1 were dispersed into NMP solvent to form the homogeneous slurries which was coated on PP separators (Celgard-2500), and then dried in a vacuum oven at 45 °C overnight. Finally, the dried functional separators were cut into round sheets with a diameter of 16.2 mm. The loading of catalysts on the functionalized separators is around 0.4 mg cm<sup>-1</sup>.

### 1.1.10 Fabrication of S/rGO cathode and Li-S coin cells assembly

The S/rGO materials were synthesized by the typical melting diffusion method. Firstly, sublimed sulfur with the mass ratio of 9:1 was exhaustively mixed with rGO in a mortar until uniform. Then, the mixed material was heated in a tubular furnace at 155 °C for 12 h under argon atmosphere as well as was heated to 200°C for 150 min to dislodge the sulfur on the surface of the material. TGA experiment analyzed the content of sulfur in the S/rGO. S/rGO, Super P and PVDF with a weight ratio of 8:1:1 were dispersed in suitable NMP solvent to produce the homogeneous slurries, following by coating onto Al foils and vacuum drying at 60 °C for 12 h. The coated Al foils were punched into a 12 mm diameter round sheets as cathodes, the sulfur loading was about 1.2-1.4 mg/cm<sup>2</sup>, and E/S (electrolyte/sulfur) ratio is identified as 15 μL/mg for general Li-S cells. The S/rGO cathode was assembled into the CR2032 coin Li-S cells with the functional separators (CNT, CoS<sub>2</sub>/CNT, CoS<sub>2</sub>/CNT and CoS<sub>2</sub>-MoS<sub>2</sub>/CNT), as well as a certain amount of DOL/DME electrolyte composing of 1 M LiTFSI and 1 % LiNO<sub>3</sub> (E/S in coin cells was 15 μm/mg). All of steps of cell assemblies were proceeded in an argon-filled glovebox (H<sub>2</sub>O:≤0.01 ppm, O<sub>2</sub>:≤0.01 ppm). CV curves and EIS tests was measured on electrochemical station (Germany ZAHNER Elektrik). CV measurement were conducted between 1.7 V and 2.8 V at the scan rate of 0.1, 0.2, 0.3, 0.4 and 0.5 mV/s. Electrochemical impedance spectroscopy (EIS) was operated with an AC voltage amplitude of 5 mV at the open-circuit potential, and the frequency range was between 10 mHz and 100 kHz. The galvanostatic charged and discharged are conducted on the LAND CT2001A test system (Wuhan Landian Electronics Co., LTD) with a voltage window 1.7-2.8 V under different current densities (1C = 1675 mA/g).

### 1.1.11 Li<sup>+</sup> diffusion coefficient evaluation

The Li<sup>+</sup> diffusion coefficient (D<sub>Li<sup>+</sup></sub>) of the Bare, CNT, CoS<sub>2</sub>/CNT, MoS<sub>2</sub>/CNT, and CoS<sub>2</sub>-MoS<sub>2</sub>/CNT separators is evaluated by the CV curves at various scan rates based on the classic Randles-Sevcik equation as follows from **Eq. 2**.

$$I_p = (2.69 \times 10^5) A v^{0.5} n^{1.5} D_{Li^+}^{0.5} C_{Li^+} \quad \text{Eq. (2)}^2$$

Where I<sub>p</sub> (A g<sup>-1</sup>) represents the peak current densities, A (1.13 cm<sup>2</sup>) stands for the area of the cathode, v (0.1-0.5 V s<sup>-1</sup>) is the scan rates, n (n=2) means the electron transfer number, C<sub>Li<sup>+</sup></sub> (1.1 mol

1  $\text{cm}^{-3}$ ) indicates the  $\text{Li}^+$  concentration in the electrolyte. The values of  $D_{\text{Li}^+}$  can be calculated by the  
2 slope ( $k$ ) of the linear relationship of the peak current densities ( $I_p$ ) versus the square root of the scan  
3 rate ( $v^{0.5}$ ).

#### 4 1.1.12 *In-situ* Raman spectroscopy experiments

5 Li-S coin cells with a quartz window on the negative shell are used for the *In-situ* Raman  
6 spectroscopy experiments. A hole of 4 mm is punched on the Li-metal anode to allow the laser of 785  
7 nm to shine on separator, and the schematic diagram of *In-situ* device are presented in **Fig. S14**. The  
8 cells are operated at a rate of 0.2 C (1 C = 1675 mA/g) to discharge and charge.

### 9 1.2. Materials Characterization

10 The morphologies of the prepared materials are characterized by Scanning electron microscope (SEM,  
11 FEI Quanta 200 FEG) and Transmission electron microscopy (TEM, Thermo Fisher Scientific Talos  
12 F200S). Crystal structures of the prepared materials are analyzed by X-ray diffraction (Rigaku D/max-  
13 2500) and Raman spectra in the wavelength of 785 nm (Renishaw in Via); chemical environment is  
14 studied by X-ray photoelectron spectroscopy (XPS, Thermo Fisher Scientific K-Alpha). The sulfur  
15 content in S/rGO materials is evaluated by Thermogravimetric Analysis (TGA, NETZSCH TG 209F1  
16 Libra) under  $\text{N}_2$  atmosphere, whose temperature from 30 °C to 600 °C at a temperature ramp rate of  
17 10 °C/min. The electron paramagnetic resonance (EPR) signals of the prepared materials are collected  
18 by an Endor spectrometer (Bruker A300) at room temperature.

## 19 2. Supporting Figures and Tables

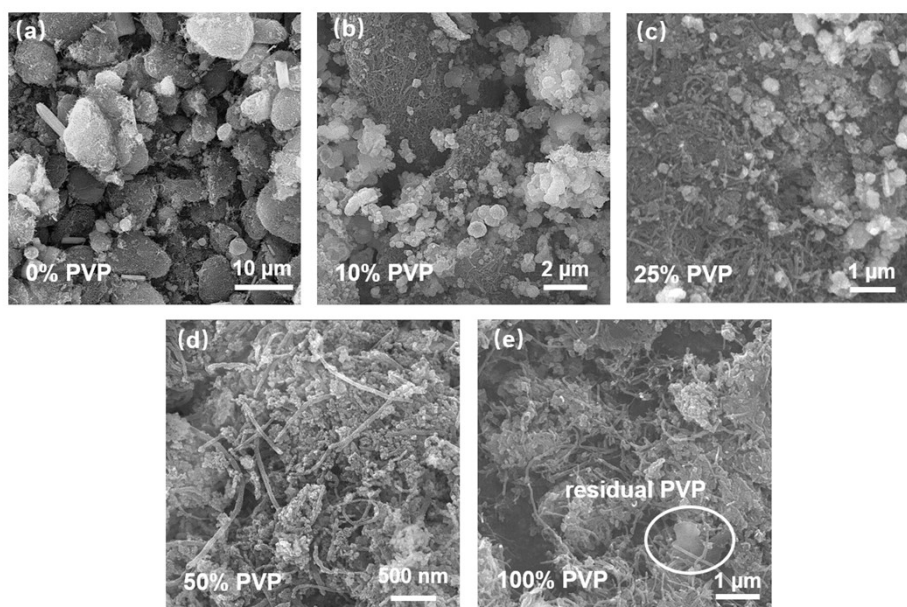

20  
21 **Figure S1.** SEM images of  $\text{CoS}_2\text{-MoS}_2/\text{CNT-x}$ , x is the mass ratio of PVP to CNT. (a) 0%, (b) 10%, (c)  
22 25%, (d) 50%, and (e) 100%.

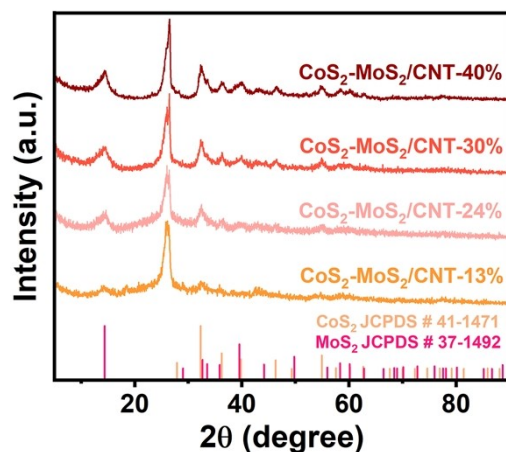

1  
 2 **Figure S2.** XRD patterns of  $\text{CoS}_2\text{-MoS}_2/\text{CNT-n}\%$  with different metal composite contents for  $n=16\%$ ,  
 3  $24\%$ ,  $30\%$  and  $40\%$ .

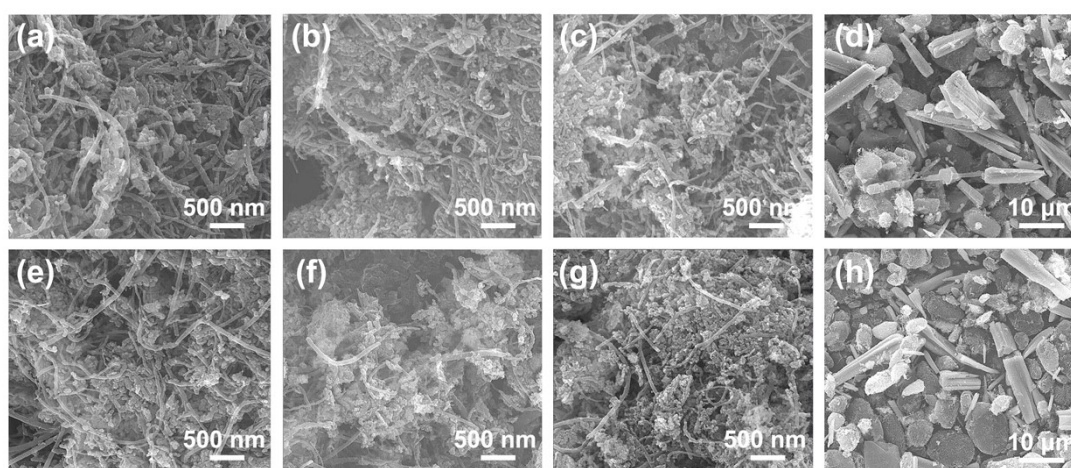

4  
 5 **Figure S3.** SEM images of  $\text{Co-Mo}/\text{CNT-n}\%$  precursor and  $\text{CoS}_2\text{-MoS}_2/\text{CNT-n}\%$  with different metal  
 6 composite contents for  $n=16\%$ ,  $24\%$ ,  $30\%$  and  $40\%$ .

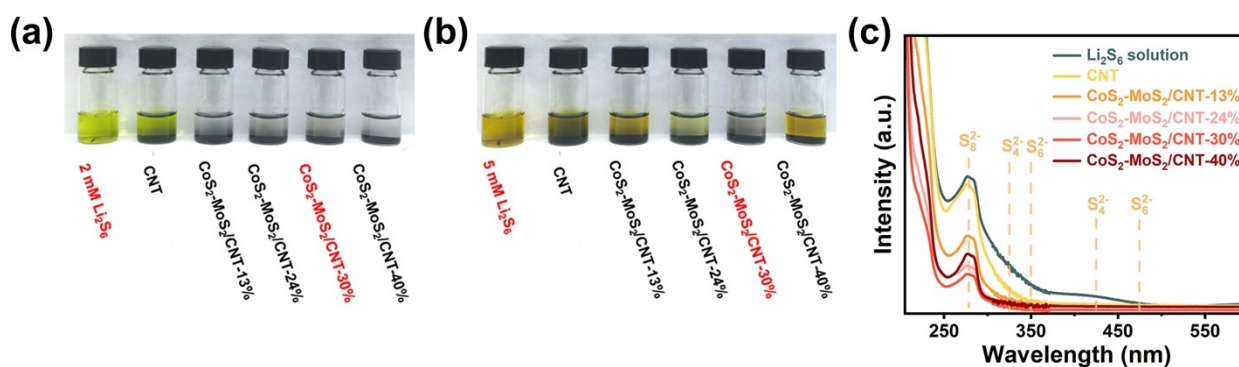

7  
 8 **Figure S4.** Digital photographs of  $2\text{ mM}$  (a) and  $5\text{ mM}$  (b)  $\text{Li}_2\text{S}_6$  absorption experiment for  $\text{CoS}_2\text{-}$   
 9  $\text{MoS}_2/\text{CNT-n}\%$  with different metal composite contents for  $n=16\%$ ,  $24\%$ ,  $30\%$  and  $40\%$ . (c) UV-VIS  
 10 spectrum of  $5\text{ mM}$   $\text{Li}_2\text{S}_6$  solution after absorption.

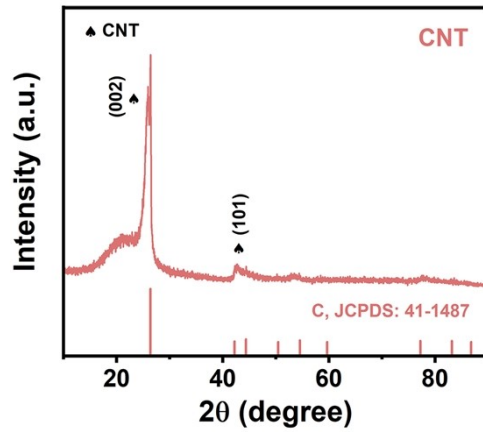

1  
2 **Figure S5.** XRD patterns of CNT.

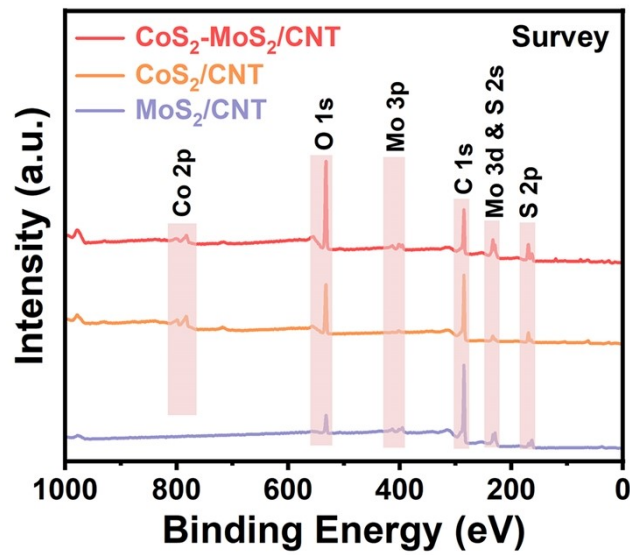

3  
4 **Figure S6.** XPS survey spectrum of CoS<sub>2</sub>/CNT, MoS<sub>2</sub>/CNT and CoS<sub>2</sub>-MoS<sub>2</sub>/CNT.

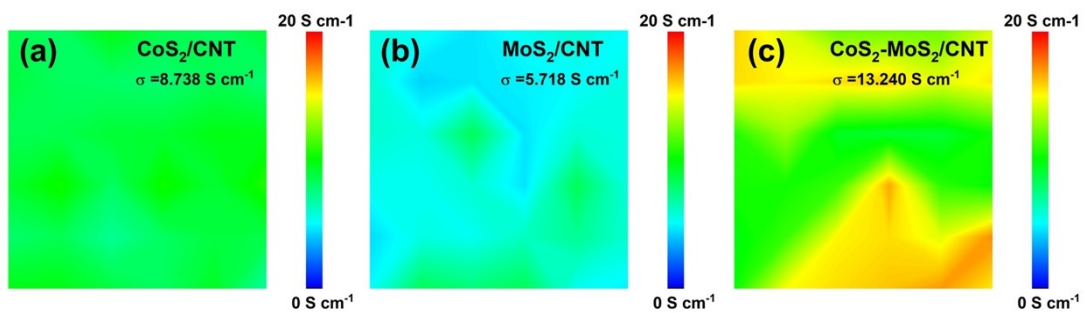

5  
6 **Figure S7.** Average conductivity of (a) CoS<sub>2</sub>/CNT, (b) MoS<sub>2</sub>/CNT and (c) CoS<sub>2</sub>-MoS<sub>2</sub>/CNT.

7

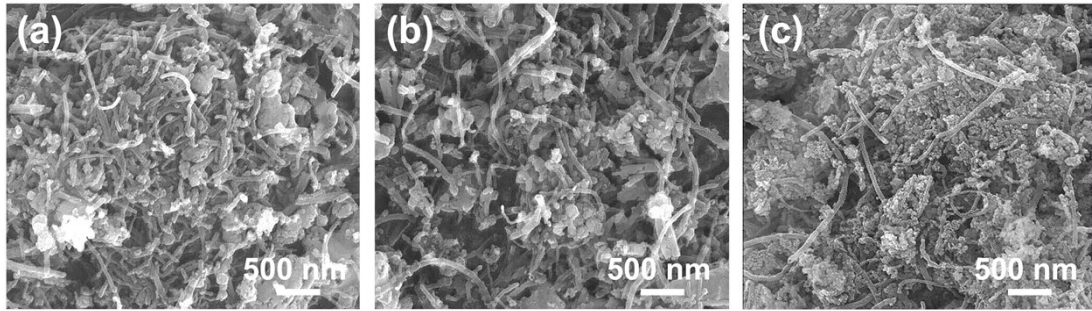

1  
2 **Figure S8.** SEM images of (a) CoS<sub>2</sub>/CNT, (b) MoS<sub>2</sub>/CNT, (c) CoS<sub>2</sub>-MoS<sub>2</sub>/CNT.

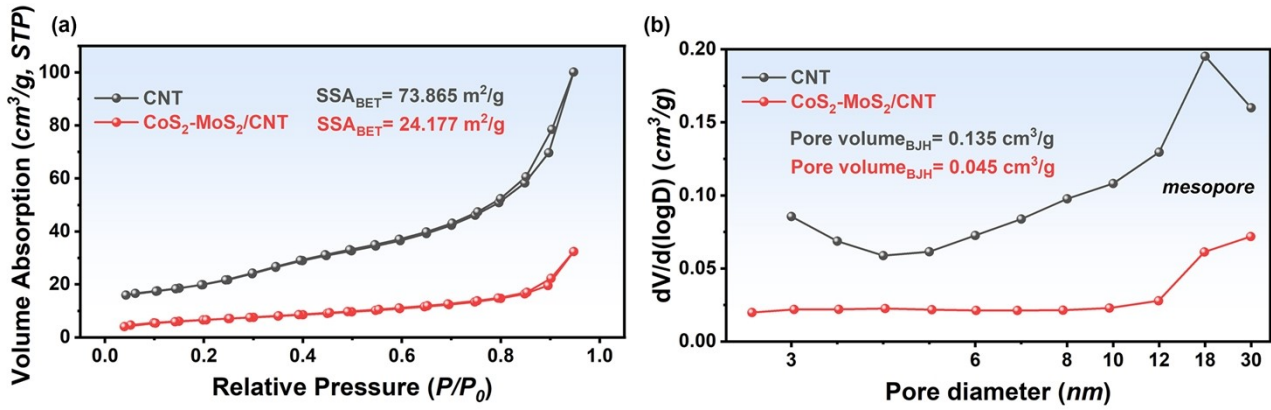

4 **Figure S9.** (a) N<sub>2</sub> adsorption-desorption isotherms, (b) corresponding pore diameter distributions of  
5 CoS<sub>2</sub>-MoS<sub>2</sub>/CNT and CNTs.

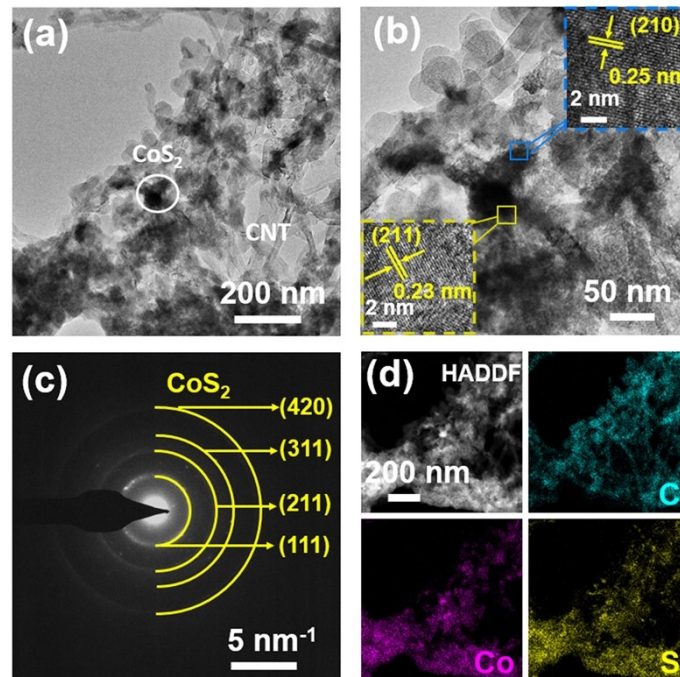

7 **Figure S10.** (a, b) TEM images (inset: HRTEM image). (c) SAED pattern (d) EDS mapping of  
8 CoS<sub>2</sub>/CNT.



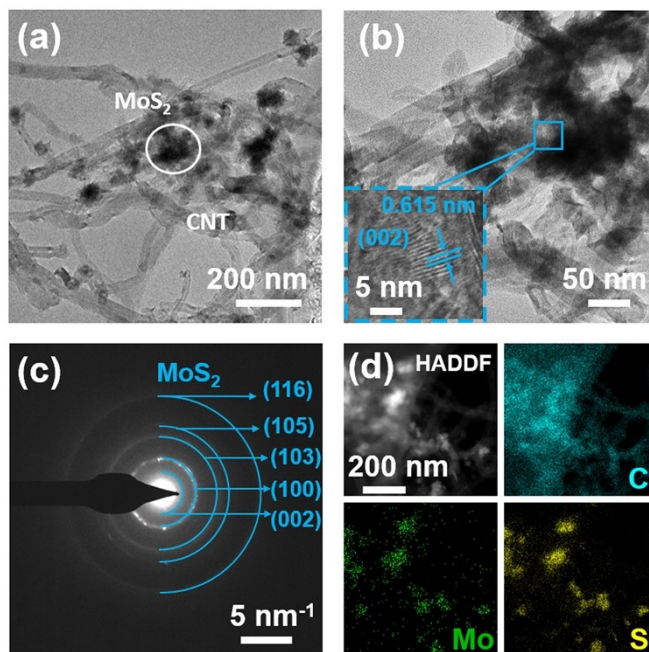

1  
 2 **Figure S11.** (a, b) TEM images (inset: HRTEM image). (c) SAED pattern (d) EDS mapping of  
 3 MoS<sub>2</sub>/CNT.

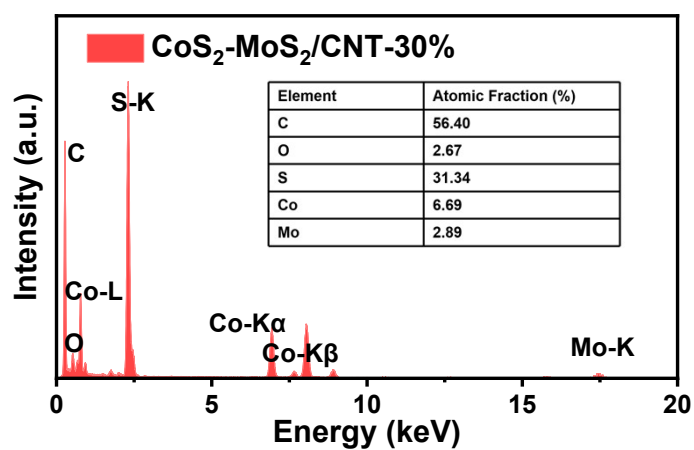

4  
 5 **Figure S12.** The EDS spectrum of CoS<sub>2</sub>-MoS<sub>2</sub>/CNT and its elemental analysis results.

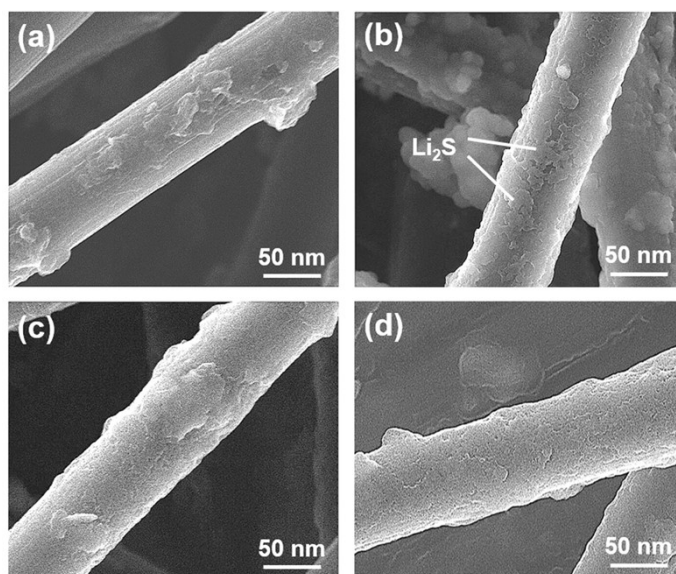

1  
 2 **Figure S13.** SEM images of (a) CP-CNT, (b) CP-CoS<sub>2</sub>/CNT, (c) CP-MoS<sub>2</sub>/CNT and (d) CP-CoS<sub>2</sub>-  
 3 MoS<sub>2</sub>/CNT after Li<sub>2</sub>S nucleation tests.  
 4

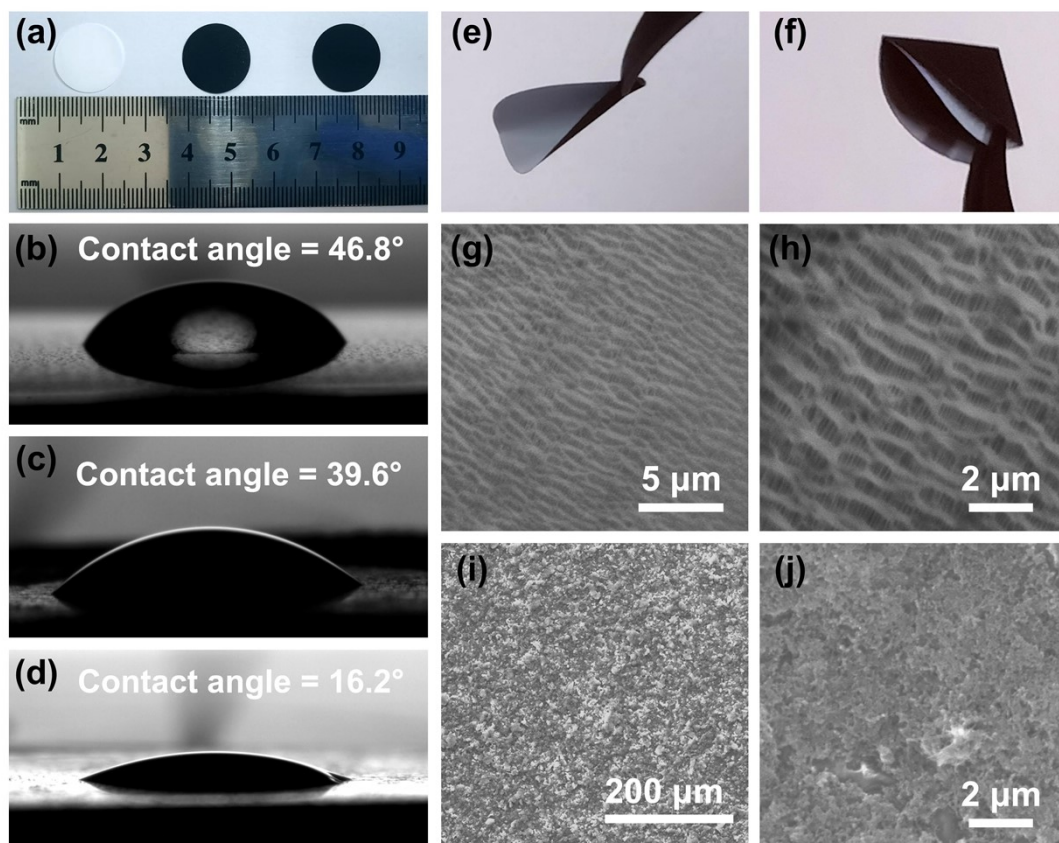

5  
 6 **Figure S14.** (a) Digital photograph of Bare, CNT and CoS<sub>2</sub>-MoS<sub>2</sub>/CNT separators are located left,  
 7 center and right. Contact angle tests for (b) Bare, (c) CNT and (d) CoS<sub>2</sub>-MoS<sub>2</sub>/CNT separators. (e-f)

1 Bending and folding tests of CoS<sub>2</sub>-MoS<sub>2</sub>/CNT separator. SEM images for the surface of (g, h) Bare  
 2 and (i, j) CoS<sub>2</sub>-MoS<sub>2</sub>/CNT separators.

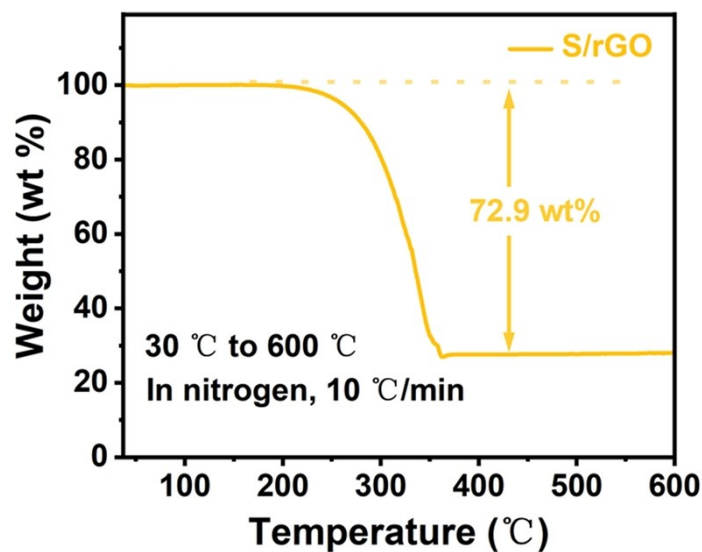

Figure S15. TGA curves of S/rGO.

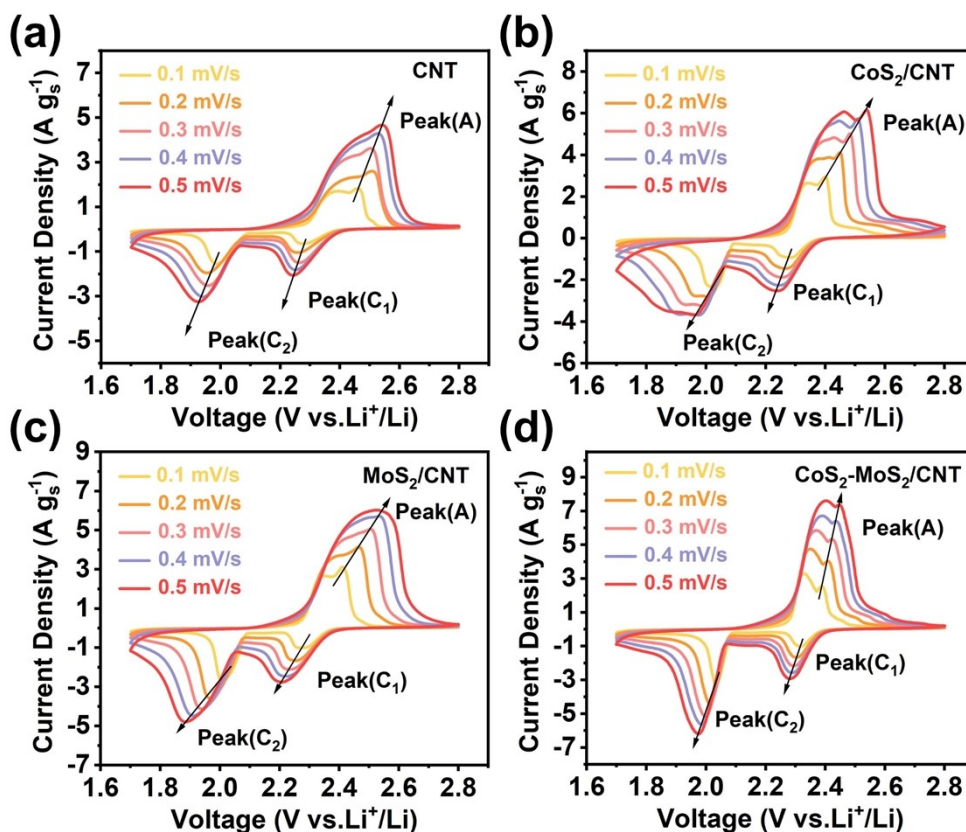

5  
 6 **Figure S16.** CV curves of Li-S cells with (a) CNT, (b) CoS<sub>2</sub>/CNT, (c) MoS<sub>2</sub>/CNT and (d) CoS<sub>2</sub>-  
 7 MoS<sub>2</sub>/CNT separators at scan rates from 0.1-0.5 mV/s.

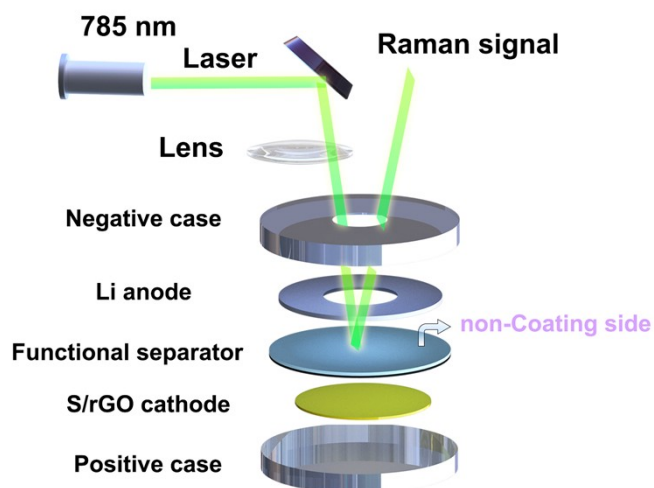

1  
2 **Figure S17.** The schematic diagram of *In-situ* Raman device.

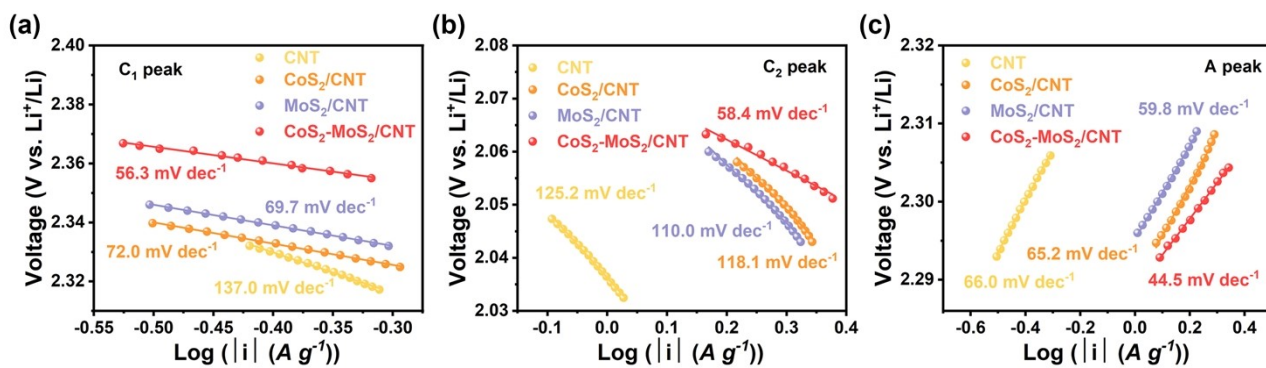

3  
4 **Figure S18.** The Tafel slopes of the corresponding redox peaks (a) C<sub>1</sub>, (b) C<sub>2</sub> and (c) A for different  
5 functionalized separators.

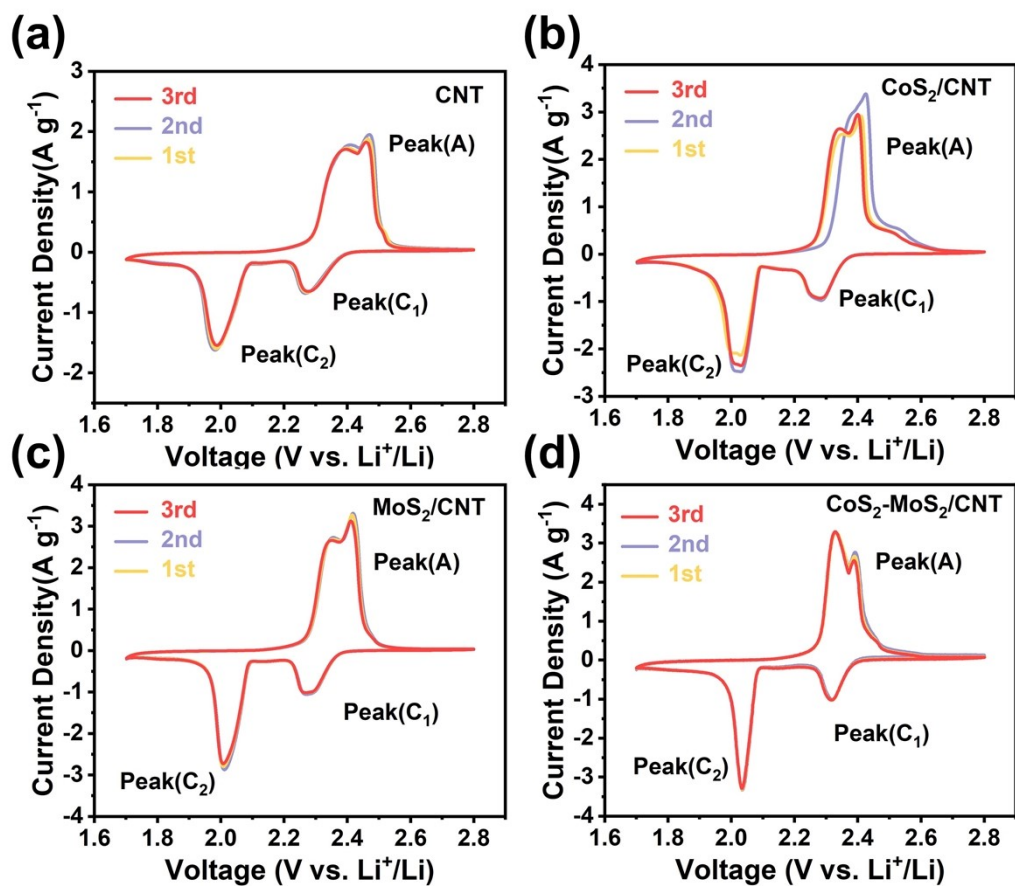

1  
 2 **Figure S19.** CV curves of the first three cycles of Li-S cells with (a) CNT, (b)  $\text{CoS}_2/\text{CNT}$ , (c)  
 3  $\text{MoS}_2/\text{CNT}$  and (d)  $\text{CoS}_2\text{-MoS}_2/\text{CNT}$  separators.  
 4

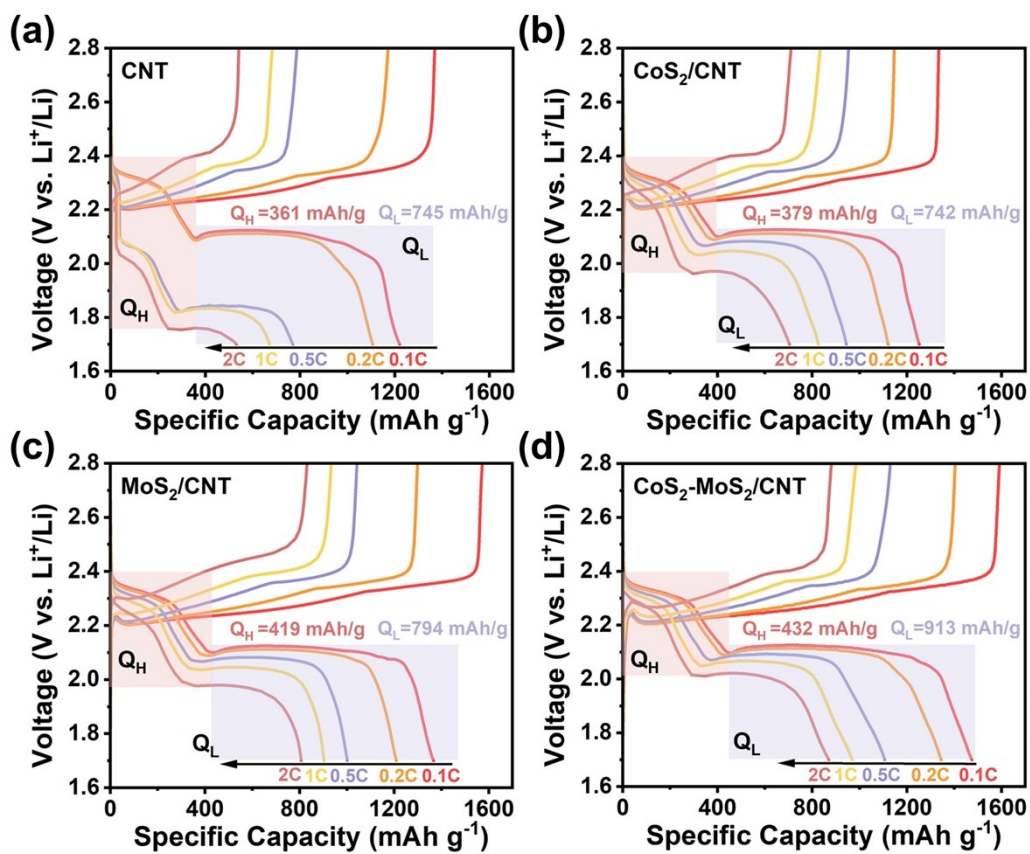

1

2 **Figure S20.** Galvanostatic charge-discharge profiles of Li-S cells based on different separators at 0.2-  
 3 2C. (a) CNT, (b) CoS<sub>2</sub>/CNT, (c) MoS<sub>2</sub>/CNT and (d) CoS<sub>2</sub>-MoS<sub>2</sub>/CNT.

4

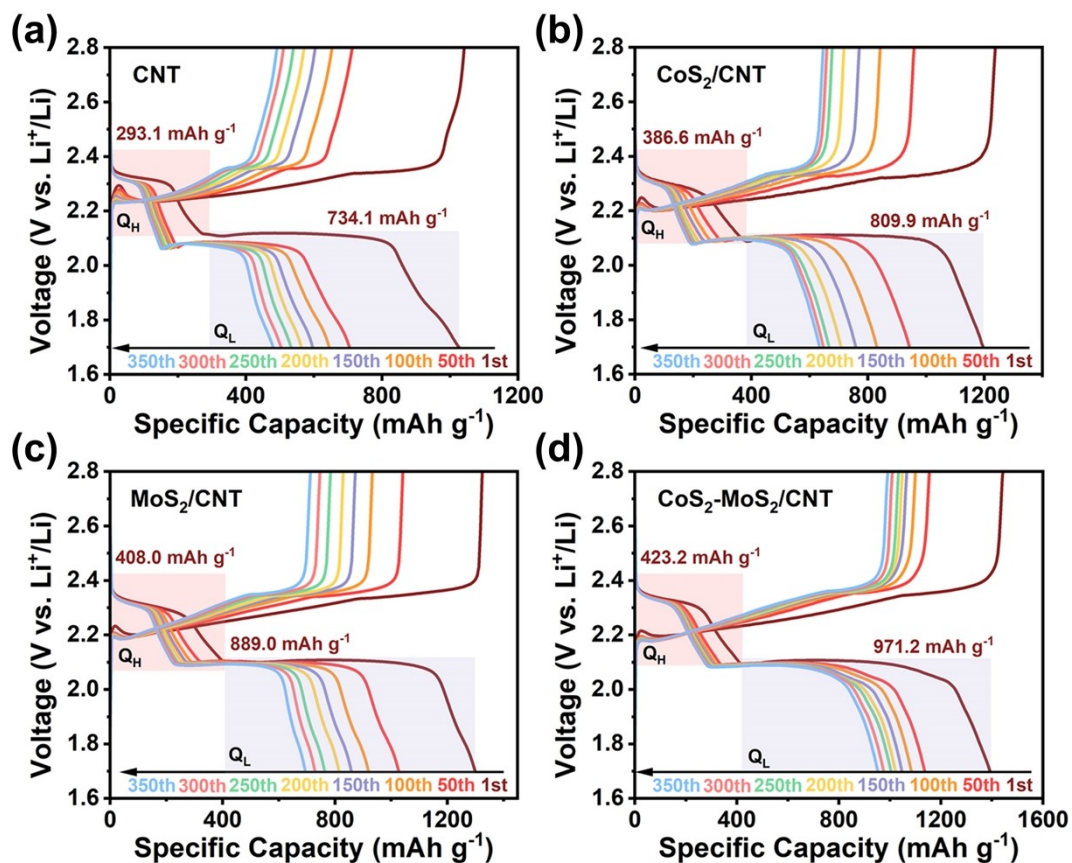

1

2 **Figure S21.** Galvanostatic charge-discharge profiles of Li-S cells based on different separators at  
 3 various cycles. (a) CNT, (b) CoS<sub>2</sub>/CNT, (c) MoS<sub>2</sub>/CNT and (d) CoS<sub>2</sub>-MoS<sub>2</sub>/CNT. (The capacity  
 4 contributed by the first and second discharge platforms is represented by Q<sub>H</sub> and Q<sub>L</sub> respectively).

**Table S1.** EIS fitting results of Li-S batteries with different separators before cycling.

| Separator samples                       | $R_s$<br>( $\Omega$ ) | $R_{ct}$<br>( $\Omega$ ) |
|-----------------------------------------|-----------------------|--------------------------|
| CNT                                     | 1.72                  | 111.70                   |
| CoS <sub>2</sub> /CNT                   | 2.53                  | 65.25                    |
| MoS <sub>2</sub> /CNT                   | 1.69                  | 62.60                    |
| CoS <sub>2</sub> -MoS <sub>2</sub> /CNT | 0.98                  | 11.99                    |

**Table S2.** EIS fitting results of Li-S batteries with different separators after 350 cycles.

| Separator samples                       | $R_s$ ( $\Omega$ ) | $R_f$ ( $\Omega$ ) | $R_{ct}$ ( $\Omega$ ) |
|-----------------------------------------|--------------------|--------------------|-----------------------|
| CNT                                     | 5.33               | 10.92              | 7.69                  |
| CoS <sub>2</sub> /CNT                   | 2.81               | 8.93               | 8.56                  |
| MoS <sub>2</sub> /CNT                   | 4.20               | 10.66              | 3.34                  |
| CoS <sub>2</sub> -MoS <sub>2</sub> /CNT | 2.70               | 5.30               | 1.96                  |



**Table S3.** The comparison of rate performance for Li-S cells in this work and the literature (1 C =

| Catalysis materials                     | Rate performance (mAh g <sup>-1</sup> ) under various current density |        |        |       |       |                    | Reference | Year |
|-----------------------------------------|-----------------------------------------------------------------------|--------|--------|-------|-------|--------------------|-----------|------|
|                                         | 0.1C                                                                  | 0.2C   | 0.5C   | 1C    | 2C    | Switched back 0.2C |           |      |
| CF/FeP@C                                | 1250                                                                  | 1105   | 910    | 594   | --    | --                 | 3         | 2019 |
| PCCNT@NPS                               | 1161                                                                  | 983    | 854    | 795   | 655   | 1043.6             | 4         | 2019 |
| rGO-CNT-CoP(A)                          | --                                                                    | 1157   | 962    | 906   | 821   | 959                | 5         | 2020 |
| 3DP-Ni <sub>2</sub> P                   | --                                                                    | 973.8  | 843.2  | 743.1 | 637.6 | 923.8              | 6         | 2021 |
| Ni/SiO <sub>2</sub> /G                  | --                                                                    | 1080   | 882    | 826   | 782   | 1092               | 7         | 2020 |
| CoO/CoP-Box                             | 1248.1                                                                | 1055.6 | 910.1  | 720.7 | 597.1 | --                 | 8         | 2023 |
| Janus-S                                 | 1244                                                                  | 1080   | 862    | 692   | 583   | --                 | 9         | 2021 |
| CoNiO <sub>2</sub> /Co <sub>4</sub> N   | --                                                                    | 1198   | 941    | 860   | 765   | --                 | 10        | 2021 |
| β-MoTe <sub>2</sub> /CNT                | --                                                                    | 933    | 817    | 736   | 671   | 759                | 11        | 2022 |
| PLG                                     | 1288                                                                  | 840    | 693.3  | 564.5 | 467.1 | --                 | 12        | 2023 |
| CoS <sub>2</sub> -MoS <sub>2</sub> /CNT | --                                                                    | 1361.4 | 1111.2 | 969.3 | 869.4 | 1151.1             | This work | 2023 |

1675 mA g<sup>-1</sup>), and the corresponding plot is presented in Fig. 7c.

**Table S4.** The comparison of cycling performance for Li-S cells in this work and the literature.

| Catalysis materials                     | Initial capacity (mAh g <sup>-1</sup> ) | Current density (C) | Cycle number | Retention capacity (mAh g <sup>-1</sup> ) | Capacity retention rate (%) | Decay ratio per cycle (%) | Reference | Year |
|-----------------------------------------|-----------------------------------------|---------------------|--------------|-------------------------------------------|-----------------------------|---------------------------|-----------|------|
| FeP                                     | 1273.7                                  | 0.1                 | 100          | 1038.4                                    | 81.5                        | 0.185                     | 13        | 2018 |
| PCCNT@NPS                               | 1118                                    | 0.2                 | 100          | 958                                       | 85.7                        | 0.143                     | 4         | 2019 |
| rGO-CNT-CoP(A)                          | 1043.6                                  | 0.2                 | 70           | 888.5                                     | 64                          | 0.200                     | 5         | 2020 |
| NC/G                                    | 1380                                    | 0.2                 | 100          | 980                                       | 71                          | 0.290                     | 14        | 2019 |
| MC-NS                                   | 1172                                    | 0.2                 | 100          | 907.5                                     | 77.4                        | 0.225                     | 15        | 2019 |
| 3DP-Ni <sub>2</sub> P                   | 942.8                                   | 0.2                 | 50           | 775.9                                     | 82.3                        | 0.354                     | 6         | 2021 |
| Ni/SiO <sub>2</sub> /G                  | 1282                                    | 0.2                 | 100          | 831                                       | 64.8                        | 0.280                     | 7         | 2020 |
| CoFe/NHCS                               | 1292                                    | 0.2                 | 100          | 1023                                      | 79.2                        | 0.208                     | 16        | 2021 |
| CoO/CoP-Box                             | 1292.5                                  | 0.1                 | 300          | 753.9                                     | 58.4                        | 0.139                     | 8         | 2023 |
| PLG                                     | 1284.4                                  | 0.2                 | 200          | 623.4                                     | 48.6                        | 0.257                     | 12        | 2023 |
| HE-LSMO                                 | 1217.9                                  | 0.2                 | 200          | 876.9                                     | 72                          | 0.140                     | 17        | 2023 |
| CoS <sub>2</sub> -MoS <sub>2</sub> /CNT | 1402.1                                  | 0.2                 | 350          | 955.6                                     | 68.2                        | 0.090                     | This work | 2023 |
| CF/FeP@C                                | 695                                     | 1.0                 | 200          | 500                                       | 71.9                        | 0.14                      | 3         | 2019 |
| 3DP-LaB <sub>6</sub> /SP                | 835                                     | 2.0                 | 1000         | 401                                       | 48                          | 0.052                     | 18        | 2020 |
| TiN@C                                   | 883                                     | 1.0                 | 600          | 636                                       | 72                          | 0.05                      | 19        | 2021 |
| MnO <sub>2</sub>                        | 700                                     | 0.5                 | 500          | 494                                       | 70.6                        | 0.058                     | 20        | 2022 |
| CoP/C                                   | 938                                     | 1.0                 | 500          | 562                                       | 59.9                        | 0.08                      | 21        | 2019 |
| Janus-S                                 | 800                                     | 1.0                 | 800          | 450                                       | 56.3                        | 0.046                     | 9         | 2021 |
| Ni/NiO-C                                | 793                                     | 1.0                 | 500          | 484                                       | 61                          | 0.078                     | 22        | 2022 |
| $\beta$ -MoTe <sub>2</sub> /CNT         | 873                                     | 1.0                 | 300          | 585                                       | 67                          | 0.11                      | 11        | 2022 |
| P-TiO <sub>2-x</sub>                    | 1049.8                                  | 1.0                 | 600          | 508.1                                     | 48.4                        | 0.086                     | 23        | 2022 |

---

|                                                 |       |     |      |       |      |       |                  |             |
|-------------------------------------------------|-------|-----|------|-------|------|-------|------------------|-------------|
| <b>Fe<sub>3</sub>C-<br/>FeN@NCF</b>             | 895   | 1.0 | 800  | 393.8 | 44   | 0.07  | <sup>24</sup>    | <b>2023</b> |
| <b>CoS<sub>2</sub>-<br/>MoS<sub>2</sub>/CNT</b> | 921.8 | 2.0 | 1000 | 589.1 | 63.9 | 0.036 | <b>This work</b> | <b>2023</b> |

---

---

### 3. Supporting References

- 1 M. Wang, L. Fan, X. Sun, B. Guan, B. Jiang, X. Wu, D. Tian, K. Sun, Y. Qiu, X. Yin, Y. Zhang and N. Zhang, *ACS Energy Lett.*, 2020, **5**, 3041-3050.
- 2 Y. Wang, Z. Deng, J. Huang, H. Li, Z. Li, X. Peng, Y. Tian, J. Lu, H. Tang, L. Chen and Z. Ye, *Energy Storage Mater.*, 2021, **36**, 466-477.
- 3 J. Shen, X. Xu, J. Liu, Z. Liu, F. Li, R. Hu, J. Liu, X. Hou, Y. Feng, Y. Yu and M. Zhu, *ACS Nano*, 2019, **13**, 8986-8996.
- 4 Z. Guang, Y. Huang, X. Chen, X. Sun, M. Wang, X. Feng, C. Chen and X. Liu, *Electrochim. Acta*, 2019, **307**, 260-268.
- 5 R. Sun, Y. Bai, M. Luo, M. Qu, Z. Wang, W. Sun and K. Sun, *ACS Nano*, 2020, **15**, 739-750.
- 6 F. Zhang, Z. Li, T. Cao, K. Qin, Q. Xu, H. Liu and Y. Xia, *ACS Sustainable Chem. Eng.*, 2021, **9**, 6097-6106.
- 7 C. Chen, Q. Jiang, H. Xu, Y. Zhang, B. Zhang, Z. Zhang, Z. Lin and S. Zhang, *Nano Energy*, 2020, **76**, 105033.
- 8 W. Zhou, X. Wang, J. Shan, L. Yue, D. Lu, L. Chen, J. Zhang and Y. Li, *J. Energy Chem.*, 2023, **80**, 128-139.
- 9 Y. Li, T. Gao, D. Ni, Y. Zhou, M. Yousaf, Z. Guo, J. Zhou, P. Zhou, Q. Wang and S. Guo, *Adv. Mater.*, 2021, **34**, 2107638.
- 10 J. Pu, W. Gong, Z. Shen, L. Wang, Y. Yao and G. Hong, *Adv. Sci.*, 2021, **9**, 2104375.
- 11 G. Lin, M. Liang, L. Liu, J. Liu, Z. Ao, Z. Shi and X. Ke, *ACS Appl. Mater. Interfaces*, 2022, **14**, 55616-55626.
- 12 C. Li, Q. Sun, Q. Zhang, C. Xu, S. Wang, Y. Ma, X. Shi, H. Zhang, D. Song and L. Zhang, *Chem. Eng. J.*, 2023, **455**, 140706.
- 13 S. Huang, Y. V. Lim, X. Zhang, Y. Wang, Y. Zheng, D. Kong, M. Ding, S. A. Yang and H. Y. Yang, *Nano Energy*, 2018, **51**, 340-348.
- 14 H. Xu, Q. Jiang, B. Zhang, C. Chen and Z. Lin, *Adv. Mater.*, 2019, **32**, 1906357.
- 15 J. Li, C. Chen, Y. Chen, Z. Li, W. Xie, X. Zhang, M. Shao and M. Wei, *Adv. Energy Mater.*, 2019,

- 
- 9**, 1901935.
- 16 Z. Gu, C. Cheng, T. Yan, G. Liu, J. Jiang, J. Mao, K. Dai, J. Li, J. Wu and L. Zhang, *Nano Energy*, 2021, **86**, 106111.
- 17 L. Tian, Z. Zhang, S. Liu, G. Li and X. Gao, *Nano Energy*, 2023, **106**, 108037.
- 18 J. Cai, Z. Fan, J. Jin, Z. Shi, S. Dou, J. Sun and Z. Liu, *Nano Energy*, 2020, **75**, 104970.
- 19 Y. Fan, K. Liu, A. Ali, X. Chen and P. K. Shen, *Electrochim. Acta*, 2021, **384**, 138187.
- 20 X. Wang, L. Yang, Y. Wang, Q. Li, C. Chen, B. Zhong, Y. Chen, X. Guo, Z. Wu, Y. Liu, Y. Liu and Y. Sun, *J. Colloid Interface Sci.*, 2022, **606**, 666-676.
- 21 J. Lin, K. Zhang, Z. Zhu, R. Zhang, N. Li and C. Zhao, *ACS Appl. Mater. Interfaces*, 2019, **12**, 2497-2504.
- 22 J. Pu, T. Wang, X. Zhu, Y. Tan, L. Gao, J. Chen, J. Huang and Z. Wang, *Electrochim. Acta*, 2022, **435**, 141396.
- 23 W. Zhang, Y. Xu, J. Liu, Y. Li, E. M. Akinoglu, Y. Zhu, Y. Zhang, X. Wang and Z. Chen, *Small Sci.*, 2022, **3**, 2200032.
- 24 M. Zhang, J. Mu, Y. Li, Y. Pan, Z. Dong, B. Chen, S. Guo, W. Yuan, H. Fang, H. Hu and M. Wu, *J. Energy Chem.*, 2023, **78**, 105-114.
